# Supplementary material for: Twin peaks: The Omicron SARS-CoV-2 BA.1 and BA.2 epidemics in England
Source: PubMed Central journal article supplement (PMC9161371; doi:10.1126/science.abq4411), 2022-05-24
Supplement: science.abq4411_sm.pdf [file science.abq4411_sm.pdf]

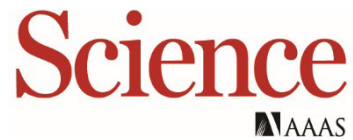

## Supplementary Materials for

### **Twin peaks: The Omicron SARS-CoV-2 BA.1 and BA.2 epidemics in England**

Paul Elliott *et al.*

Corresponding authors: Paul Elliott, [p.elliott@imperial.ac.uk](mailto:p.elliott@imperial.ac.uk); Christl A. Donnelly, [c.donnelly@imperial.ac.uk](mailto:c.donnelly@imperial.ac.uk);  
Marc Chadeau-Hyam, [m.chadeau@imperial.ac.uk](mailto:m.chadeau@imperial.ac.uk)

DOI: [10.1126/science.abq4411](https://doi.org/10.1126/science.abq4411)

#### **The PDF file includes:**

Supplementary Text  
Tables S1 to S3

#### **Other Supplementary Material for this manuscript includes the following:**

MDAR Reproducibility Checklist

## **Supplementary Text**

### **Link to questionnaires**

The full questionnaire for Round 19 is available here:

[https://www.imperial.ac.uk/media/imperial-college/institute-of-global-health-innovation/REACT1\\_Round-19\\_ANTIGEN-Individual-Questionnaire\\_March-2022.pdf](https://www.imperial.ac.uk/media/imperial-college/institute-of-global-health-innovation/REACT1_Round-19_ANTIGEN-Individual-Questionnaire_March-2022.pdf)

Those for other rounds can be found here:

<https://www.imperial.ac.uk/medicine/research-and-impact/groups/react-study/for-researchers/react-1-study-materials/>

**Table S1A.** Weighted prevalence of SARS-CoV-2 swab-positivity in rounds 18 and 19 by sex, age, region, urban/rural area, employment, and ethnic group.

| Variable             |                                            | Round 18 |        |                      | Round 19 |        |                      |
|----------------------|--------------------------------------------|----------|--------|----------------------|----------|--------|----------------------|
|                      |                                            | Positive | Total  | Weighted Prevalence  | Positive | Total  | Weighted Prevalence  |
| Sex                  | Male                                       | 1,199    | 40,936 | 2.97% (2.80%, 3.15%) | 2,960    | 47,514 | 6.41% (6.17%, 6.66%) |
|                      | Female                                     | 1,532    | 54,005 | 2.79% (2.64%, 2.95%) | 3,942    | 61,663 | 6.32% (6.12%, 6.54%) |
|                      | Unknown                                    | 0        | 9      | *                    | 0        | 4      | *                    |
| Age                  | 05-11                                      | 161      | 3,392  | 4.69% (4.01%, 5.48%) | 319      | 3,627  | 8.81% (7.89%, 9.82%) |
|                      | 12-17                                      | 261      | 7,584  | 3.42% (3.00%, 3.91%) | 428      | 9,132  | 4.71% (4.21%, 5.25%) |
|                      | 18-24                                      | 205      | 7,407  | 2.70% (2.33%, 3.13%) | 444      | 7,705  | 5.65% (5.11%, 6.23%) |
|                      | 25-34                                      | 463      | 14,970 | 3.05% (2.77%, 3.35%) | 1,150    | 15,620 | 7.13% (6.72%, 7.57%) |
|                      | 35-44                                      | 492      | 14,386 | 3.43% (3.13%, 3.76%) | 1,115    | 15,206 | 7.16% (6.75%, 7.61%) |
|                      | 45-54                                      | 371      | 11,976 | 3.09% (2.79%, 3.43%) | 920      | 13,055 | 6.96% (6.52%, 7.43%) |
|                      | 55-64                                      | 343      | 14,405 | 2.37% (2.13%, 2.64%) | 1,094    | 17,897 | 6.09% (5.74%, 6.46%) |
|                      | 65-74                                      | 308      | 13,635 | 2.21% (1.98%, 2.48%) | 981      | 17,321 | 5.63% (5.29%, 6.00%) |
|                      | 75+                                        | 127      | 7,195  | 1.68% (1.41%, 2.01%) | 451      | 9,618  | 4.61% (4.20%, 5.07%) |
| Region               | North West                                 | 291      | 11,386 | 2.58% (2.28%, 2.92%) | 787      | 13,281 | 5.84% (5.42%, 6.29%) |
|                      | North East                                 | 100      | 4,364  | 2.33% (1.88%, 2.87%) | 263      | 4,987  | 5.37% (4.72%, 6.10%) |
|                      | Yorkshire and The Humber                   | 229      | 9,133  | 2.48% (2.15%, 2.85%) | 615      | 10,678 | 5.84% (5.36%, 6.36%) |
|                      | West Midlands                              | 264      | 9,745  | 2.63% (2.31%, 2.99%) | 617      | 11,471 | 5.28% (4.85%, 5.75%) |
|                      | East Midlands                              | 211      | 8,295  | 2.53% (2.18%, 2.93%) | 582      | 9,763  | 6.02% (5.51%, 6.56%) |
|                      | East of England                            | 298      | 10,658 | 2.92% (2.58%, 3.29%) | 845      | 12,102 | 7.17% (6.67%, 7.70%) |
|                      | South West                                 | 316      | 9,911  | 3.12% (2.77%, 3.51%) | 908      | 11,479 | 8.13% (7.59%, 8.71%) |
|                      | London                                     | 508      | 15,480 | 3.20% (2.92%, 3.52%) | 1,065    | 17,061 | 6.16% (5.77%, 6.57%) |
|                      | South East                                 | 514      | 15,978 | 3.33% (3.04%, 3.66%) | 1,220    | 18,359 | 6.72% (6.32%, 7.13%) |
| Living in urban area | Yes                                        | 2,217    | 76,453 | 2.92% (2.80%, 3.06%) | 5,418    | 87,429 | 6.22% (6.05%, 6.40%) |
|                      | No                                         | 501      | 18,249 | 2.68% (2.44%, 2.94%) | 1,473    | 21,487 | 6.97% (6.60%, 7.35%) |
|                      | Unknown                                    | 13       | 248    | 3.90% (2.22%, 6.75%) | 11       | 265    | 4.63% (2.41%, 8.74%) |
| Employment type      | Health care or care home worker            | 269      | 7,812  | 3.27% (2.87%, 3.73%) | 623      | 8,659  | 7.27% (6.66%, 7.93%) |
|                      | Other essential/key worker                 | 418      | 13,396 | 3.14% (2.83%, 3.48%) | 1,052    | 14,134 | 7.29% (6.83%, 7.77%) |
|                      | Other worker                               | 1,093    | 37,420 | 3.01% (2.83%, 3.21%) | 2,804    | 41,832 | 6.70% (6.44%, 6.97%) |
|                      | Not full-time, part-time, or self-employed | 885      | 34,073 | 2.54% (2.36%, 2.72%) | 2,284    | 42,132 | 5.44% (5.20%, 5.68%) |
|                      | Unknown                                    | 66       | 2,249  | 2.79% (2.16%, 3.60%) | 139      | 2,424  | 6.02% (5.06%, 7.16%) |
| Ethnic group         | White                                      | 2,346    | 80,897 | 2.90% (2.78%, 3.03%) | 6,014    | 93,599 | 6.49% (6.32%, 6.67%) |
|                      | Asian                                      | 194      | 6,642  | 2.95% (2.52%, 3.43%) | 399      | 7,463  | 5.26% (4.71%, 5.87%) |
|                      | Black                                      | 44       | 2,063  | 2.27% (1.66%, 3.10%) | 114      | 2,140  | 5.43% (4.44%, 6.63%) |
|                      | Mixed                                      | 63       | 1,997  | 3.29% (2.50%, 4.31%) | 141      | 2,188  | 6.80% (5.65%, 8.18%) |
|                      | Other                                      | 29       | 1,083  | 2.94% (1.97%, 4.36%) | 70       | 1,163  | 5.86% (4.53%, 7.54%) |
|                      | Unknown                                    | 55       | 2,268  | 2.27% (1.70%, 3.02%) | 164      | 2,628  | 6.16% (5.24%, 7.24%) |

\* Prevalence estimates are not reported if based on less than 10 observations

**Table S1B.** Weighted prevalence of SARS-CoV-2 swab-positivity in round 18 and round 19 by household size, number of children in the household, smoking and vaping status, contact with a COVID-19 case, reported previous COVID-19, protective behaviours, symptom status.

| Variable                            | Round 18                                           |       |                     |                         | Round 19 |        |                         |  |
|-------------------------------------|----------------------------------------------------|-------|---------------------|-------------------------|----------|--------|-------------------------|--|
|                                     | Positive                                           | Total | Weighted Prevalence |                         | Positive | Total  | Weighted Prevalence     |  |
| Household size                      | 1                                                  | 288   | 14,239              | 1.87% (1.65%, 2.11%)    | 914      | 17,093 | 5.26% (4.92%, 5.63%)    |  |
|                                     | 2                                                  | 845   | 33,450              | 2.50% (2.33%, 2.68%)    | 2,422    | 39,996 | 6.03% (5.79%, 6.28%)    |  |
|                                     | 3                                                  | 543   | 18,194              | 3.06% (2.79%, 3.35%)    | 1,416    | 20,059 | 6.91% (6.54%, 7.30%)    |  |
|                                     | 4                                                  | 716   | 19,042              | 3.88% (3.58%, 4.20%)    | 1,475    | 21,416 | 7.13% (6.74%, 7.53%)    |  |
|                                     | 5                                                  | 219   | 6,570               | 3.33% (2.87%, 3.85%)    | 462      | 7,051  | 6.97% (6.28%, 7.73%)    |  |
|                                     | 6+                                                 | 120   | 3,455               | 3.36% (2.76%, 4.09%)    | 213      | 3,566  | 6.02% (5.17%, 6.99%)    |  |
| Number of children in the household | 0                                                  | 1,407 | 58,734              | 2.31% (2.19%, 2.44%)    | 4,114    | 69,000 | 5.89% (5.71%, 6.08%)    |  |
|                                     | 1+                                                 | 1,072 | 28,474              | 3.88% (3.63%, 4.14%)    | 2,334    | 30,809 | 7.55% (7.22%, 7.89%)    |  |
|                                     | Unknown                                            | 252   | 7,742               | 3.16% (2.78%, 3.60%)    | 454      | 9,372  | 4.72% (4.29%, 5.19%)    |  |
| Smoking status                      | Never                                              | 1,229 | 43,924              | 2.70% (2.55%, 2.87%)    | 3,364    | 51,182 | 6.49% (6.27%, 6.72%)    |  |
|                                     | Former                                             | 604   | 21,844              | 2.70% (2.49%, 2.93%)    | 1,720    | 26,598 | 6.36% (6.06%, 6.68%)    |  |
|                                     | Current                                            | 129   | 5,057               | 2.63% (2.19%, 3.14%)    | 341      | 5,744  | 5.70% (5.10%, 6.36%)    |  |
|                                     | Unknown                                            | 769   | 24,125              | 3.33% (3.08%, 3.61%)    | 1,477    | 25,657 | 6.30% (5.95%, 6.67%)    |  |
| Vaping status                       | Never                                              | 1,760 | 63,668              | 2.68% (2.55%, 2.81%)    | 4,912    | 75,246 | 6.43% (6.25%, 6.62%)    |  |
|                                     | Former                                             | 103   | 3,670               | 2.87% (2.34%, 3.51%)    | 265      | 4,213  | 5.97% (5.27%, 6.76%)    |  |
|                                     | Current                                            | 109   | 4,079               | 2.70% (2.22%, 3.28%)    | 294      | 4,762  | 6.22% (5.52%, 7.01%)    |  |
|                                     | Unknown                                            | 759   | 23,533              | 3.37% (3.11%, 3.65%)    | 1,431    | 24,960 | 6.28% (5.93%, 6.66%)    |  |
| COVID case contact                  | No                                                 | 1,187 | 69,708              | 1.73% (1.62%, 1.84%)    | 3,130    | 78,334 | 4.00% (3.86%, 4.16%)    |  |
|                                     | Yes, contact with a confirmed/tested COVID-19 case | 1,056 | 10,312              | 10.35% (9.72%, 11.02%)  | 2,724    | 15,387 | 17.84% (17.17%, 18.52%) |  |
|                                     | Yes, contact with a suspected COVID-19 case        | 142   | 2,098               | 6.86% (5.77%, 8.15%)    | 398      | 3,243  | 12.50% (11.28%, 13.83%) |  |
|                                     | Unknown                                            | 346   | 12,832              | 2.55% (2.27%, 2.85%)    | 650      | 12,217 | 5.29% (4.87%, 5.74%)    |  |
| Shielding                           | Yes                                                | 426   | 17,277              | 2.39% (2.16%, 2.65%)    | 1,216    | 20,353 | 6.00% (5.66%, 6.37%)    |  |
|                                     | No                                                 | 1,953 | 64,720              | 3.08% (2.93%, 3.23%)    | 5,021    | 76,481 | 6.64% (6.45%, 6.84%)    |  |
|                                     | Unknown                                            | 352   | 12,953              | 2.58% (2.31%, 2.89%)    | 665      | 12,347 | 5.33% (4.91%, 5.78%)    |  |
| Frequency wearing mask indoors      | Always                                             | 717   | 24,303              | 2.85% (2.64%, 3.08%)    | 1,196    | 17,895 | 6.59% (6.21%, 6.99%)    |  |
|                                     | Sometimes                                          | 1,111 | 37,147              | 3.01% (2.83%, 3.20%)    | 2,767    | 39,189 | 7.07% (6.80%, 7.35%)    |  |
|                                     | Hardly ever                                        | 109   | 3,901               | 2.89% (2.37%, 3.52%)    | 326      | 5,254  | 6.12% (5.45%, 6.87%)    |  |
|                                     | Never                                              | 36    | 1,378               | 2.40% (1.70%, 3.40%)    | 89       | 1,595  | 5.48% (4.40%, 6.80%)    |  |
|                                     | Unknown                                            | 758   | 28,221              | 2.77% (2.56%, 3.00%)    | 2,524    | 45,248 | 5.81% (5.56%, 6.06%)    |  |
| Symptom status                      | Classic COVID symptoms*                            | 1,175 | 7,845               | 15.06% (14.21%, 15.95%) | 3,230    | 11,602 | 27.57% (26.68%, 28.47%) |  |
|                                     | Other symptoms                                     | 530   | 13,651              | 3.85% (3.52%, 4.22%)    | 1,343    | 16,963 | 7.87% (7.43%, 8.33%)    |  |
|                                     | No symptoms                                        | 682   | 60,676              | 1.17% (1.08%, 1.27%)    | 1,687    | 68,450 | 2.60% (2.47%, 2.74%)    |  |
|                                     | Unknown                                            | 344   | 12,778              | 2.53% (2.26%, 2.84%)    | 642      | 12,166 | 5.21% (4.80%, 5.66%)    |  |

\* Classic COVID symptoms: loss or change of sense of smell or taste, fever, new persistent cough

**Table S2.** Multivariable logistic regression for round 19. Results are presented as Odds Ratios (95% confidence interval) adjusted for age and sex and additionally for region and all other variables (mutually adjusted OR).

|                                     | Category                                   | Round 19                 |                    |
|-------------------------------------|--------------------------------------------|--------------------------|--------------------|
|                                     |                                            | Adjusted for age and sex | Mutually adjusted* |
| Employment type                     | Health care or care home worker            | 1.04 (0.95, 1.14)        | 1.05 (0.96, 1.15)  |
|                                     | Other essential/key worker                 | 1.08 (1.00, 1.16)        | 1.07 (0.99, 1.15)  |
|                                     | Other worker                               | Ref                      | Ref                |
|                                     | Not full-time, part-time, or self-employed | 0.92 (0.86, 0.98)        | 0.90 (0.84, 0.96)  |
|                                     | Unknown                                    | 0.97 (0.81, 1.16)        | 0.98 (0.82, 1.18)  |
| Ethnic group                        | White                                      | Ref                      | Ref                |
|                                     | Asian                                      | 0.78 (0.70, 0.86)        | 0.82 (0.73, 0.91)  |
|                                     | Black                                      | 0.78 (0.64, 0.94)        | 0.83 (0.69, 1.01)  |
|                                     | Mixed                                      | 0.94 (0.79, 1.12)        | 0.97 (0.81, 1.15)  |
|                                     | Other                                      | 0.88 (0.69, 1.12)        | 0.92 (0.72, 1.18)  |
|                                     | Unknown                                    | 0.99 (0.84, 1.16)        | 1.03 (0.88, 1.21)  |
| Household size                      | 1-2                                        | Ref                      | Ref                |
|                                     | 3-5                                        | 1.15 (1.08, 1.22)        | 1.09 (1.01, 1.17)  |
|                                     | 6+                                         | 1.04 (0.90, 1.21)        | 1.07 (0.91, 1.25)  |
| Number of children in the household | 0                                          | Ref                      | Ref                |
|                                     | 1+                                         | 1.15 (1.08, 1.23)        | 1.09 (1.01, 1.18)  |
|                                     | Unknown                                    | 1.05 (0.88, 1.25)        | 1.07 (0.90, 1.28)  |
| Smoking status                      | Never                                      | Ref                      | Ref                |
|                                     | Former                                     | 1.02 (0.96, 1.08)        | 1.03 (0.96, 1.10)  |
|                                     | Current                                    | 0.86 (0.77, 0.97)        | 0.91 (0.80, 1.04)  |
|                                     | Unknown                                    | 0.88 (0.81, 0.95)        | 0.95 (0.76, 1.19)  |
| Vaping status                       | Never                                      | Ref                      | Ref                |
|                                     | Former                                     | 0.91 (0.80, 1.03)        | 0.95 (0.83, 1.09)  |
|                                     | Current                                    | 0.90 (0.79, 1.01)        | 0.92 (0.81, 1.05)  |
|                                     | Unknown                                    | 0.87 (0.80, 0.94)        | 0.90 (0.72, 1.14)  |
| Living in urban area                | Yes                                        | 0.86 (0.81, 0.92)        | 0.93 (0.88, 0.99)  |
|                                     | No                                         | Ref                      | Ref                |
|                                     | Unknown                                    | 0.53 (0.29, 0.97)        | 0.58 (0.31, 1.06)  |
| Deprivation                         | 1 Most deprived                            | 0.74 (0.68, 0.81)        | 0.82 (0.75, 0.90)  |
|                                     | 2                                          | 0.86 (0.80, 0.93)        | 0.91 (0.84, 0.98)  |
|                                     | 3                                          | 0.96 (0.89, 1.03)        | 0.97 (0.91, 1.04)  |
|                                     | 4                                          | 0.94 (0.88, 1.01)        | 0.95 (0.88, 1.01)  |
|                                     | 5 Least deprived                           | Ref                      | Ref                |

\*Odds ratios are mutually adjusted for all variables shown and for age and region

**Table S3.** Proportion of each of the N=4,445 SARS-CoV-2 lineages detected in positive samples with at least 50% genome coverage from round 19. Results are based on 5,621 positive sequenced samples.

| Lineage             | N (4,445) | Percentage                |
|---------------------|-----------|---------------------------|
| Omicron sub-lineage | 4,444     | 99.9% ( 99.9% , 100.0% )  |
| BA.1                | 27        | 0.61% ( 0.42% , 0.88% )   |
| BA.1.1              | 262       | 5.89% ( 5.24% , 6.63% )   |
| BA.1.1.1            | 14        | 0.32% ( 0.19% , 0.53% )   |
| BA.1.1.1.10         | 1         | 0.02% ( 0.00% , 0.13% )   |
| BA.1.1.1.12         | 6         | 0.14% ( 0.06% , 0.29% )   |
| BA.1.1.1.13         | 6         | 0.14% ( 0.06% , 0.29% )   |
| BA.1.1.1.14         | 11        | 0.25% ( 0.14% , 0.44% )   |
| BA.1.1.1.15         | 11        | 0.25% ( 0.14% , 0.44% )   |
| BA.1.1.1.4          | 1         | 0.02% ( 0.00% , 0.13% )   |
| BA.1.1.1.9          | 1         | 0.02% ( 0.00% , 0.13% )   |
| BA.1.1.10           | 2         | 0.05% ( 0.01% , 0.16% )   |
| BA.1.1.12           | 1         | 0.02% ( 0.00% , 0.13% )   |
| BA.1.1.13           | 3         | 0.07% ( 0.02% , 0.20% )   |
| BA.1.1.15           | 5         | 0.11% ( 0.05% , 0.26% )   |
| BA.1.1.15.1         | 4         | 0.09% ( 0.04% , 0.23% )   |
| BA.1.1.16           | 7         | 0.16% ( 0.08% , 0.32% )   |
| BA.1.1.17           | 41        | 0.92% ( 0.68% , 1.25% )   |
| BA.1.1.17.2         | 1         | 0.02% ( 0.00% , 0.13% )   |
| BA.1.5              | 1         | 0.02% ( 0.00% , 0.13% )   |
| BA.2                | 3,676     | 82.7% ( 81.56% , 83.78% ) |
| BA.2.1              | 124       | 2.79% ( 2.34% , 3.32% )   |
| BA.2.10             | 9         | 0.20% ( 0.11% , 0.38% )   |
| BA.2.12             | 12        | 0.27% ( 0.15% , 0.47% )   |
| BA.2.2              | 5         | 0.11% ( 0.05% , 0.26% )   |
| BA.2.3              | 165       | 3.71% ( 3.20% , 4.31% )   |
| BA.2.8              | 3         | 0.07% ( 0.02% , 0.20% )   |
| BA.2.9              | 32        | 0.72% ( 0.51% , 1.01% )   |
| BA.3                | 13        | 0.29% ( 0.17% , 0.50% )   |
| Delta sub-lineage   |           |                           |
| AY.4                | 1         | 0.02% ( 0.00% , 0.13% )   |

We also detected (N=10) BA.1/BA.2 recombinants: 7 XE, 2 XL, and 1 XJ.
